# Supplementary material
Source: HighWire-hosted journal article supplement (https://ejhp.bmj.com/content/26/1/46)
Supplement: inline-supplementary-material-1 [file inline-supplementary-material-1.docx]

Appendix 1: Table with variables in the standard dataset

| **Name** | **Description** | **Mandatory** | **Unique key** |
| --- | --- | --- | --- |
| **Demographic information** | | | |
| Hospital number | Unique, designated number for each participating hospital | Yes | Yes |
| Patient number | An unique, pseudonymised code based the original hospital patient identification number. Each hospital keeps its own key. | Yes | Yes |
| Gender | Male, Female | Yes | No |
| Year and month of birth |  | Yes | No |
| Date of death | Date of death as recorded within the hospital information system | No | No |
| **Pharmaceutical prescription data** | | | |
| Medication prescription number | Unique number | Yes | Yes |
| Patient number | Refers to the patient number in the demographic information | Yes | No |
| Article number | Unique number per atc code and medicine name | Yes | No |
| Administration route | Normalised to a list of 28 options | Yes | No |
| Start date | Start date of treatment | Yes | No |
| Stop date | Stop date of treatment | No | No |
| Dosing frequency | Number of doses per day/week etc. | No | No |
| Number of dosing units | Number of dosing units per administration | No | No |
| Dosing unit | Tablet, mg, mmol etc. per dosing unit | No | No |
| Potency | The amount of drug in one dosing unit, expressed as 500mg, 75mg/ml etc. | Yes | No |
| ATC code | Six figure code based on the international Anatomical Therapeutic Chemical Classification System | No | No |
| DDD | Defined Daily Dose as recorded within the ATC system | Assigned in central database environment | No |
| WCIA25 code | Working Group on Coordination of Information Automation Coding system for unequivocal recording of dosing | No | No |
| Medicine name | As recorded within the local system | Yes | No |
| **Admission information** | | | |
| Admission number | Unique number | Yes | Yes |
| Sub-admission number | For each change between departments or specialties a new number is generated. Combined with the admission number this is the unique key within the admission table. | Yes | Yes |
| Patient number | Refers to the patient number in the demographic information | Yes | No |
| Start date | Start date of the sub-admission | Yes | No |
| Stop date | Stop date of the sub-admission | No | No |
| Department | Hospital department, normalised to four options (CCU, ICU/MCU, general ward, unspecified) | Yes | No |
| Admisison type | Whether it is a clinical or non-clinical admission | No | No |
| Type of care provider | Number that refers to a national list of care provider types | Yes | No |
| Type of care provider description | Description from the national list | Assigned in central database environment | No |
| Differentiated type of care provider | Number that refers to a national list | Yes | No |
| Differentiated type of care provider description | Description from the national list | Assigned in central database environment | No |
| **Reimbursement information** | | | |
| Treatment number | Unique number per individual hospital treatment | Yes | Yes |
| Patient number | Refers to the patient number in the demographic information | Yes | No |
| Care trajectory number | A number that connects treatments for one health issue for one patient within the same specialty   |  |  | | --- | --- | | Yes | No |
| Reimbursement code | Determined by national system for reimbursement | No | No |
| Start date | Start date of the treatment | Yes | No |
| Stop date | Stop date of the treatment | No | No |
| Type of care provider | Number that refers to a national list of care provider types (medical specialist etc.) | Yes | No |
| Type of care provider description | Description from the national list | Assigned in central database environment | No |
| Differentiated type of care provider number | Number that refers to a national list of differentiated types of care providers (doctor of internal medicine etc.) | Yes | No |
| Differentiated type of care provider description | Description from the national list | Assigned in central database environment | No |
| Type of care number | Number indicating ‘Regular care’, ‘Emergency’ or ‘Continuation of regular care’ in accordance with the DBC systematic | Yes | No |
| Type of care description | Description of type of care number | Assigned in central database environment | No |
| Diagnosis number | Specialty-specific diagnosis in accordance with the DBC systematic | Yes | No |
| Diagnosis description | Description of diagnosis number | Yes | No |
| ICD-10 code | Mandatory from July 1 2016 | Yes | No |
| ICD-10 description |  | No | No |
